# Supplementary material for: Family systems approaches in pediatric obesity management: a scoping review
Source: Springer Nature journal article supplement (doi:10.1186/s12887-024-04646-w), 2024-04-02
Supplement: MOESM1 [file 26934524]

**Supplemental File 1. Detailed search strategy implemented in MEDLINE, CINAHL, EMBASE and PSYCHINFO**

**A) MEDLINE search conducted on April 2 2020 and updated on October 27, 2023**

1. Family Health/
2. exp Family relations/
3. Parenting/
4. exp Parent-Child Relations/
5. Family Therapy/
6. Family Systems Theory.tw,kf.
7. Circumplex Model of Family Functioning.tw,kf.
8. Double ABCX Model of Family Stress.tw,kf.
9. Family Stress Model of Economic Strain.tw,kf.
10. Family Development Theory.tw,kf.
11. Ecologic Systems Theory.tw,kf.
12. General Systems Theory.tw,kf.
13. Calgary Family Assessment Intervention Model.tw,kf.
14. ("Calgary Family" adj 2 model).tw,kf.
15. Structural Family Therapy.tw,kf.
16. Emotion-Focused Family Model.tw,kf.
17. (family adj3 (based or function\* or communicat\* or cohesion or system\* or model\* or approach\* or dynamic\* or cohesion or organiz\* or theory or theories)).tw,kf.
18. 1 or 2 or 3 or 4 or 5 or 6 or 7 or 8 or 9 or 10 or 11 or 12 or 13 or 14 or 15 or 16 or 17
19. Adolescent/
20. exp Child/
21. 19 or 20
22. Obesity/ or Overweight/
23. 21 and 22
24. Pediatric Obesity/
25. ((obesity or obese or overweight or adiposity) adj10 (child\* or p?ediatric or youth or adolescent\* or teen\* or preteen\* or pre-teen\* or toddler\* or preschooler\* or juvenile)).tw,kf,jw.
26. 23 or 24 or 25
27. 18 and 26

**B) CINAHL search conducted on April 2 2020**

| #   | Query            | Results   |
|-----|------------------|-----------|
| S33 | S31 AND S32      | 2,440     |
| S32 | EM 1930-20200402 | 7,185,153 |

|     |                                                                                                                                                                                                                                                                                                                                |         |
|-----|--------------------------------------------------------------------------------------------------------------------------------------------------------------------------------------------------------------------------------------------------------------------------------------------------------------------------------|---------|
| S31 | S6 AND S30                                                                                                                                                                                                                                                                                                                     | 2,531   |
| S30 | S7 OR S8 OR S9 OR S10 OR S11 OR S12 OR S13 OR S14 OR S15 OR S16 OR S17 OR S18 OR S19 OR S20 OR S21 OR S22 OR S23 OR S24 OR S25 OR S26 OR S27 OR S28 OR S29                                                                                                                                                                     | 113,279 |
| S29 | TI ( family N3 (based or function* or communicat* or cohesion or system* or model* or approach* or dynamic* or cohesion or organiz* or theory or theories)) ) OR AB ( family N3 (based or function* or communicat* or cohesion or system* or model* or approach* or dynamic* or cohesion or organiz* or theory or theories)) ) | 26,513  |
| S28 | TI Family Stress Model of Economic Strain OR AB Family Stress Model of Economic Strain                                                                                                                                                                                                                                         | Display |
| S27 | TI Family Stress Model of Economic Strain OR AB Family Stress Model of Economic Strain                                                                                                                                                                                                                                         | Display |
| S26 | TI Double ABCX Model of Family Stress OR AB Double ABCX Model of Family Stress                                                                                                                                                                                                                                                 | Display |
| S25 | TI Circumplex Model of Family Functioning OR AB Circumplex Model of Family Functioning                                                                                                                                                                                                                                         | 2       |
| S24 | TI Family Systems Theory OR AB Family Systems Theory                                                                                                                                                                                                                                                                           | Display |
| S23 | (MH "Parent-Child Relations+")                                                                                                                                                                                                                                                                                                 | Display |
| S22 | (MH "Family Therapy") OR (MH "Family Therapy (Iowa NIC)")                                                                                                                                                                                                                                                                      | Display |
| S21 | TI Emotion-Focused Family Model OR AB Emotion-Focused Family Model                                                                                                                                                                                                                                                             | Display |
| S20 | TI Emotion-Focused Family Model OR AB Emotion-Focused Family Model                                                                                                                                                                                                                                                             | Display |
| S19 | TI Emotion-Focused Family Therapy OR AB Emotion-Focused Family Therapy                                                                                                                                                                                                                                                         | Display |
| S18 | TI Structural Family Therapy OR AB Structural Family Therapy                                                                                                                                                                                                                                                                   | Display |
| S17 | TI "Calgary Family" N2 model OR AB "Calgary Family" N2 model                                                                                                                                                                                                                                                                   | Display |
| S16 | TI Calgary Family Assessment Intervention Model OR AB Calgary Family Assessment Intervention Model                                                                                                                                                                                                                             | Display |
| S15 | TI Calgary Family Assessment Intervention Model OR AB Calgary Family Assessment Intervention Model                                                                                                                                                                                                                             | Display |

|     |                                                                                                                                                                                                                                                                                                                                                                        |         |
|-----|------------------------------------------------------------------------------------------------------------------------------------------------------------------------------------------------------------------------------------------------------------------------------------------------------------------------------------------------------------------------|---------|
| S14 | TI General Systems Theory OR AB General Systems Theory                                                                                                                                                                                                                                                                                                                 | Display |
| S13 | TI Ecologic Systems Theory OR AB Ecologic Systems Theory                                                                                                                                                                                                                                                                                                               | Display |
| S12 | (MH "Child Rearing")                                                                                                                                                                                                                                                                                                                                                   | Display |
| S11 | TI Ecologic Systems Theory OR AB Ecologic Systems Theory                                                                                                                                                                                                                                                                                                               | Display |
| S10 | TI Family Development Theory OR AB Family Development Theory                                                                                                                                                                                                                                                                                                           | Display |
| S9  | (MH "Parenting")                                                                                                                                                                                                                                                                                                                                                       | Display |
| S8  | (MH "Family Health")                                                                                                                                                                                                                                                                                                                                                   | Display |
| S7  | (MH "Family Functioning+") OR (MH "Family Relations+")                                                                                                                                                                                                                                                                                                                 | Display |
| S6  | S3 OR S4 OR S5                                                                                                                                                                                                                                                                                                                                                         | 40,420  |
| S5  | TI ( (obesity or obese or overweight or adiposity) N10 (child* or p?ediatric or youth or adolescent* or teen* or preteen* or pre-teen* or toddler* or preschooler* or juvenile) ) OR AB ( (obesity or obese or overweight or adiposity) N10 (child* or p?ediatric or youth or adolescent* or teen* or preteen* or pre-teen* or toddler* or preschooler* or juvenile) ) | Display |
| S4  | (MH "Pediatric Obesity")                                                                                                                                                                                                                                                                                                                                               | Display |
| S3  | S1 AND S2                                                                                                                                                                                                                                                                                                                                                              | 20,666  |
| S2  | (MH "Obesity") OR (MH "Obesity, Morbid")                                                                                                                                                                                                                                                                                                                               | Display |
| S1  | (MH "Adolescence+") OR (MH "Child") OR (MH "Child, Abandoned") OR (MH "Child, Disabled") OR (MH "Child, Gifted") OR (MH "Child, Institutionalized") OR (MH "Child, Medically Fragile") OR (MH "Child, Preschool") OR (MH "Latchkey Children") OR (MH "Only Child")                                                                                                     | Display |

**C) EMBASE search conducted on June 2 2020**

1. parenthood/ or child rearing/
2. family relation/ or exp child parent relation/ or family conflict/
3. family counseling/ or parent counseling/
4. family health/
5. (family adj3 (based or function\* or communicat\* or cohesion or system\* or model\* or approach\* or dynamic\* or cohesion or organiz\* or theory or theories)).tw,kw.
6. Family Systems Theory.tw,kw.

**Title:** Family systems approaches in pediatric obesity management: A scoping review  
**Authors:** N Wills-Ibarra, K Chemtob, H Hart, F Frati, KJ Pratt, GD Ball, A Van Hulst

7. Circumplex Model of Family Functioning.tw,kw.
8. Double ABCX Model of Family Stress.tw,kw.
9. Family Stress Model of Economic Strain.tw,kw.
10. Family Development Theory.tw,kw.
11. Ecologic Systems Theory.tw,kw.
12. General Systems Theory.tw,kw.
13. Calgary Family Assessment Intervention Model.tw,kw.
14. Structural Family Therapy.tw,kw.
15. ("Calgary Family" adj 2 model).tw,kw.
16. Emotion-Focused Family Model.tw,kw.
17. 1 or 2 or 3 or 4 or 5 or 6 or 7 or 8 or 9 or 10 or 11 or 12 or 13 or 14 or 15 or 16
18. adolescent/
19. exp child/
20. 18 or 19
21. obesity/
22. 20 and 21
23. childhood obesity/
24. ((obesity or obese or overweight or adiposity) adj10 (child\* or p?ediatric or youth or adolescent\* or teen\* or preteen\* or pre-teen\* or toddler\* or preschooler\* or juvenile)).tw,kw.
25. 22 or 23 or 24
26. 17 and 25

#### **D) PSYCHINFO search conducted on June 2 2020**

1. exp parenting/ or childrearing attitudes/ or parental attitudes/ or parental characteristics/
2. Family Systems Theory/
3. exp family therapy/
4. Family Intervention/
5. (family adj3 (based or function\* or communicat\* or cohesion or system\* or model\* or approach\* or dynamic\* or cohesion or organiz\* or theory or theories)).tw.
6. Family Systems Theory.tw.
7. Circumplex Model of Family Functioning.tw.
8. Double ABCX Model of Family Stress.tw.
9. Family Stress Model of Economic Strain.tw.
10. Family Development Theory.tw.
11. Ecologic Systems Theory.tw.
12. General Systems Theory.tw.
13. Calgary Family Assessment Intervention Model.tw.
14. Structural Family Therapy.tw.
15. ("Calgary Family" adj 2 model).tw.

**Title:** Family systems approaches in pediatric obesity management: A scoping review  
**Authors:** N Wills-Ibarra, K Chemtob, H Hart, F Frati, KJ Pratt, GD Ball, A Van Hulst

16. Emotion-Focused Family Model.tw.
17. 1 or 2 or 3 or 4 or 5 or 6 or 7 or 8 or 9 or 10 or 11 or 12 or 13 or 14 or 15 or 16
18. exp adolescent development/ or adolescent health/
19. exp childhood development/
20. 18 or 19
21. obesity/
22. 20 and 21
23. ((obesity or obese or overweight or adiposity) adj10 (child\* or p?ediatric or youth or adolescent\* or teen\* or preteen\* or pre-teen\* or toddler\* or preschooler\* or juvenile)).tw.
24. 22 or 23
25. 17 and 24
26. limit 25 to (english or french or spanish)
27. limit 26 to yr="1980 -Current"
