# Supplementary material for: Family systems approaches in pediatric obesity management: a scoping review
Source: Springer Nature journal article supplement (doi:10.1186/s12887-024-04646-w), 2024-04-02
Supplement: MOESM2 [file 26934524]

**Supplemental Table 2: Description of n=50 obesity management intervention studies included by intervention name**

| <b>Intervention/<br/>program name</b>                                             | <b>Author and<br/>year</b>         | <b>Description vs.<br/>Evaluation</b> | <b>Total sample size at<br/>baseline</b>    | <b>Study design</b>                                | <b>FST/model that guided<br/>intervention development</b>          | <b>Other theories that guided<br/>intervention development</b> |
|-----------------------------------------------------------------------------------|------------------------------------|---------------------------------------|---------------------------------------------|----------------------------------------------------|--------------------------------------------------------------------|----------------------------------------------------------------|
| <b>Creating Health<br/>Environments for<br/>Chicago Kids<br/>(CHECK) Trial</b>    | Appelhans,<br>2020 <sup>1</sup>    | Description                           | 266 children and their<br>parents/guardians | RCT                                                | Socioecological Model<br>Parents as Agents of<br>Change            | n/a                                                            |
| <b>Dyad plus</b>                                                                  | Dilley, 2020 <sup>2</sup>          | Description                           | 45 parent-adolescent dyads                  | Pilot RCT                                          | FST, Familial Approach to<br>the Treatment of Childhood<br>Obesity | Social Cognitive Theory, Self-<br>Determination Theory         |
| <b>ENTREN-F</b>                                                                   | Rojo, 2022 <sup>3</sup>            | Description                           | 165 children and their<br>parents/guardians | RCT protocol                                       | FST                                                                | Cognitive Behavioural Therapy                                  |
|                                                                                   | Rojo, 2022 <sup>4</sup>            | Evaluation                            | 165 children and their<br>parents/guardians | Secondary analysis<br>of a RCT                     | FST                                                                | Cognitive Behavioural Therapy                                  |
| <b>Exergaming for<br/>Health</b>                                                  | Christison, 2016 <sup>5</sup>      | Evaluation                            | 80 children and their<br>parents/guardians  | RCT                                                | FST                                                                | Social Cognitive Theory                                        |
| <b>Familias Unidas<br/>(United Families<br/>for Health and<br/>Wellness-FUHW)</b> | Prado, 2020 <sup>6</sup>           | Evaluation                            | 280 adolescents and their<br>parents        | RCT                                                | FST, Eco-developmental<br>framework                                | n/a                                                            |
|                                                                                   | Perrino, 2022 <sup>7</sup>         | Evaluation                            | 280 adolescents and their<br>parents        | Secondary analysis<br>of a RCT                     | FST, Eco-developmental<br>framework                                | n/a                                                            |
| <b>Families<br/>Improving<br/>Together (FIT)</b>                                  | Alia, 2015 <sup>8</sup>            | Description                           | 19 adolescent-parent dyads                  | Process evaluation<br>of RCT                       | FST                                                                | Self-Determination Theory,<br>Social Cognitive Theory          |
|                                                                                   | Sweeney, 2019 <sup>9</sup>         | Evaluation                            | 41 adolescents and 41 parents               | Qualitative study                                  | FST                                                                | Self-Determination Theory,<br>Social Cognitive Theory          |
|                                                                                   | Wilson, 2015 <sup>10</sup>         | Description                           | 520 families (expected)                     | RCT Protocol                                       | FST                                                                | Self-Determination Theory,<br>Social Cognitive Theory          |
|                                                                                   | Wilson, 2018 <sup>11</sup>         | Evaluation                            | 125 parent-adolescent dyads                 | RCT                                                | FST                                                                | Self-Determination Theory,<br>Social Cognitive Theory          |
|                                                                                   | Wilson, 2021 <sup>12</sup>         | Evaluation                            | 241 parent/caregiver-<br>adolescent dyads   | RCT                                                | FST                                                                | Self-Determination Theory,<br>Social Cognitive Theory          |
|                                                                                   | Quattlebaum,<br>2021 <sup>13</sup> | Evaluation                            | 127 parent-adolescent dyads                 | Secondary analysis<br>of baseline data of a<br>RCT | FST                                                                | n/a                                                            |
|                                                                                   | Wilson, 2022 <sup>14</sup>         | Evaluation                            | 241 adolescent-caregiver<br>dyads           | RCT                                                | FST                                                                | Self-Determination Theory,<br>Social Cognitive Theory          |
| <b>Families<br/>Improving<br/>Together-</b>                                       | Biggs, 2023 <sup>15</sup>          | Description                           | 6 families                                  | Pilot RCT                                          | FST                                                                | Social Cognitive Theory, Self-<br>Determination Theory         |

|                                                            |                                |             |                                   |                                                                  |                                                                                       |                                                                   |
|------------------------------------------------------------|--------------------------------|-------------|-----------------------------------|------------------------------------------------------------------|---------------------------------------------------------------------------------------|-------------------------------------------------------------------|
| <b>Telehealth (FIT-T)</b>                                  |                                |             |                                   |                                                                  |                                                                                       |                                                                   |
| <b>Families on the Move (FOTM)</b>                         | James, 2008 <sup>16</sup>      | Description | 18 children and 14 mothers        | Pilot feasibility study using mixed methods                      | FST                                                                                   | The Family Based Health Centered Approach (Golan & Weizman, 2001) |
| <b>Family Connections</b>                                  | Estabrooks, 2009 <sup>17</sup> | Evaluation  | 220 parent-child dyads            | RCT                                                              | Social Ecologic Theory (model proposed by Golan et al. - Parents as Agents of Change) | n/a                                                               |
|                                                            | Zoellner, 2019 <sup>18</sup>   | Description | 116-150 (expected)                | RCT Protocol                                                     | Social Ecologic Theory (model proposed by Golan et al. - Parents as Agents of Change) | n/a                                                               |
|                                                            | Zoellner, 2022 <sup>19</sup>   | Evaluation  | 139 children                      | RCT                                                              | Social Ecologic Theory (model proposed by Golan et al. - Parents as Agents of Change) | n/a                                                               |
| <b>Family Weight School Model</b>                          | Nowicka, 2008 <sup>20</sup>    | Evaluation  | 72 adolescents and their parents  | Quasi-experimental design (with control group, no randomization) | Systemic Family Therapy                                                               | Solution-focused Therapy (Shazer, Berg & colleagues)              |
| <b>Fit Kids / Fit Families (FKFF)</b>                      | Joose, 2008 <sup>21</sup>      | Evaluation  | 68 children and their families    | Pre- and post-analysis of intervention                           | FST                                                                                   | n/a                                                               |
| <b>Diabetes Prevention Program among Latino Youths</b>     | Soltero, 2017 <sup>22</sup>    | Description | 120 adolescents (expected)        | RCT Protocol                                                     | Expanded Eco-developmental Model                                                      | Social Cognitive Theory                                           |
|                                                            | Peña, 2022 <sup>23</sup>       | Evaluation  | 117 adolescents and their parents | RCT                                                              | Expanded Eco-developmental Model                                                      | Social Cognitive Theory                                           |
| <b>Lighter Living program (LiLi)</b>                       | Orban, 2014 <sup>24</sup>      | Evaluation  | 30 parents and 17 children        | RCT                                                              | Systems Theory                                                                        | ValMO model and an eco-cultural perspective                       |
| <b>Lund Overweight and Obesity Preschool Study (LOOPS)</b> | Onnerfalt, 2012 <sup>25</sup>  | Description | 240 parents (expected)            | RCT protocol                                                     | FST / Ecological systems theory                                                       | N/A                                                               |
|                                                            | Law, 2014 <sup>26</sup>        | Evaluation  | 13,998 children                   | Mixed methods                                                    | Systems Theory                                                                        | Learning Theory, Social Cognitive Theory                          |

|                                                                              |                                     |             |                                     |                                         |                                                 |                                                        |
|------------------------------------------------------------------------------|-------------------------------------|-------------|-------------------------------------|-----------------------------------------|-------------------------------------------------|--------------------------------------------------------|
| <b>Mind, Exercise, Nutrition, Do it! (MEND)</b>                              | Sacher, 2010 <sup>27</sup>          | Evaluation  | 116 children and their parents      | RCT                                     | Systems Theory                                  | Learning Theory, Social Cognitive Theory               |
|                                                                              | Wilson, 2019 <sup>28</sup>          | Evaluation  | 549 children and their families     | Secondary analysis of RCT               | Social Ecological Model                         | Social Cognitive Theory                                |
| <b>Motivational + family weight loss intervention (M + FWL)</b>              | Kitzman-Ulrich, 2011 <sup>29</sup>  | Evaluation  | 20 families                         | Pilot RCT                               | FST                                             | Self-Determination Theory, Cognitive Dissonance Theory |
| <b>Multidisciplinary family-based behavioural therapy for obesity (FBBT)</b> | Chamay Weber, 2016 <sup>30</sup>    | Evaluation  | 23 parents and 21 adolescents       | Qualitative study                       | FST                                             | Cognitive Behavioural Theory                           |
| <b>Multidisciplinary Treatment Program</b>                                   | Bocca, 2014 <sup>31</sup>           | Evaluation  | 75 children                         | RCT                                     | FST                                             | Developmental Psychology, Learning Theory              |
|                                                                              | Bocca, 2018 <sup>32</sup>           | Evaluation  | 75 children                         | RCT                                     | FST                                             | Developmental Psychology, Learning Theory              |
| <b>Multifamily Therapy plus Psychoeducation</b>                              | Kitzman-Ulrich, 2009 <sup>33</sup>  | Evaluation  | 42 adolescent and their parents     | RCT                                     | FST                                             | Social Cognitive Theory                                |
| <b>Multisystemic Therapy</b>                                                 | Ellis, 2010 <sup>34</sup>           | Evaluation  | 49 adolescents and their families   | Pilot RCT with repeated measures design | Multisystemic Therapy                           | Cognitive Behavioural Theory                           |
|                                                                              | Idalski Carcone, 2011 <sup>35</sup> | Description | 10 adolescents and their parents    | Qualitative phenomenology               | Multisystemic Therapy                           | n/a                                                    |
|                                                                              | Naar-King, 2009 <sup>36</sup>       | Evaluation  | 49 adolescents and their caregivers | Pilot RCT                               | Multisystemic Therapy, Social-ecological Theory | Cognitive Behavioural Theory                           |
| <b>No name</b>                                                               | Flodmark, 1993 <sup>37</sup>        | Evaluation  | 94 children                         | Clinical Trial                          | FST                                             | n/a                                                    |
| <b>Parents as Agents of Change (PAC)</b>                                     | Ball, 2017 <sup>38</sup>            | Description | 58 families                         | Intervention mapping & Pilot study      | FST                                             | Cognitive Behavioural Theory                           |
|                                                                              | Ball, 2012 <sup>39</sup>            | Description | 90 families (expected)              | RCT Protocol                            | FST / Parents as Agents of Change               | n/a                                                    |

|                                                                           |                               |             |                                         |                                        |                                                          |                                                      |
|---------------------------------------------------------------------------|-------------------------------|-------------|-----------------------------------------|----------------------------------------|----------------------------------------------------------|------------------------------------------------------|
|                                                                           | Spence, 2017 <sup>40</sup>    | Evaluation  | 52 families                             | RCT                                    | FST/Parents as Agents of Change; Ecologic Systems Theory | Cognitive Behavioural Theory                         |
|                                                                           | Spence, 2023 <sup>41</sup>    | Evaluation  | 52 families                             | RCT                                    | FST/Parents as Agents of Change; Ecologic Systems Theory | Cognitive Behavioural Theory                         |
| <b>Positively Fit</b>                                                     | Steele, 2011 <sup>42</sup>    | Evaluation  | 93 families                             | RCT                                    | Multisystemic Theory                                     | n/a                                                  |
| <b>SHINE</b>                                                              | St George, 2013 <sup>43</sup> | Evaluation  | 73 adolescents-caregiver dyads          | Multiple Cohort RCT                    | FST                                                      | Social Cognitive Theory, Self-Determination Theory   |
|                                                                           | St George, 2018 <sup>44</sup> | Evaluation  | 89 adolescents and their parents        | Multiple Cohort RCT                    | FST                                                      | Social Cognitive Theory, Self-Determination Theory   |
| <b>Solution-focused family therapy</b>                                    | Nowicka, 2007 <sup>45</sup>   | Evaluation  | 44 children and their parents           | Pre- and post-analysis of intervention | Systemic Family Therapy                                  | Solution-focused Therapy (Shazer, Berg & colleagues) |
| <b>Standard Behavioral Treatment + Enhanced Parenting (SBT + EP)</b>      | Hadley, 2015 <sup>46</sup>    | Evaluation  | 38 mother-adolescent dyads              | Qualitative study post RCT             | FST                                                      | n/a                                                  |
|                                                                           | Jelalian, 2015 <sup>47</sup>  | Evaluation  | 49 adolescents and a caregiver          | RCT                                    | FST                                                      | n/a                                                  |
| <b>T.A.F.F. (Telephone based Adiposity prevention For Families) study</b> | Herget, 2015 <sup>48</sup>    | Evaluation  | 154 adolescents                         | RCT                                    | Solution-Focused Systemic Therapy                        | n/a                                                  |
|                                                                           | Markert, 2014 <sup>49</sup>   | Evaluation  | 303 children and their families         | RCT                                    | Solution-Focused Systemic Therapy                        | n/a                                                  |
|                                                                           | Markert, 2013 <sup>50</sup>   | Description | 303 candidates started the intervention | RCT Protocol                           | Systems Theory                                           | n/a                                                  |

## References

1. Appelhans BM, French SA, Bradley LE, et al. CHECK: A randomized trial evaluating the efficacy and cost-effectiveness of home visitation in pediatric weight loss treatment. *Contemp Clin Trials* 2020;88:105891.
2. Dilley JR, Singletary CR, Ard JD, et al. Protocol for a randomized controlled feasibility study of a coordinated parent/child weight loss intervention: Dyad Plus. *Transl J Am Coll Sports Med* 2020;5(12).
3. Rojo M, Lacruz T, Solano S, et al. ENTREN-F family-system based intervention for managing childhood obesity: Study protocol for a randomized controlled trial at primary care. *Obesity research & clinical practice* 2022;16(4):319-329.
4. Rojo M, Lacruz T, Solano S, et al. Family-reported barriers and predictors of short-term attendance in a multidisciplinary intervention for managing childhood obesity: A psycho-family-system based randomised controlled trial (ENTREN-F). *Eur Eat Disord Rev* 2022;30(6):746-759.
5. Christison AL, Evans TA, Bleess BB, et al. Exergaming for health: A randomized study of community-based exergaming curriculum in pediatric weight management. *Games Health J* 2016;5(6):413-421.

**Title:** Family systems approaches in pediatric obesity management: A scoping review **Authors:** N Wills-Ibarra, K Chemtob, H Hart, F Frati, KJ Pratt, GD Ball, A Van Hulst

6. Prado G, Fernandez A, St George SM, et al. Results of a Family-Based Intervention Promoting Healthy Weight Strategies in Overweight Hispanic Adolescents and Parents: An RCT. *Am J Prev Med* 2020;59(5):658-668.
7. Perrino T, Brincks AM, Estrada Y, et al. Reducing Screen-Based Sedentary Behavior Among Overweight and Obese Hispanic Adolescents Through a Family-Based Intervention. *J Phys Act Health* 2022;19(7):509-517.
8. Alia KA, Wilson DK, McDaniel T, et al. Development of an innovative process evaluation approach for the Families Improving Together (FIT) for weight loss trial in African American adolescents. *Eval. Program Plann.* 2015;49:106-116.
9. Sweeney AM, Wilson DK, Loncar H, et al. Secondary benefits of the families improving together (FIT) for weight loss trial on cognitive and social factors in African American adolescents. *Int J Behav Nutr Phys Act* 2019;16(1):1-10.
10. Wilson DK, Kitzman-Ulrich H, Resnicow K, et al. An overview of the Families Improving Together (FIT) for weight loss randomized controlled trial in African American families. *Contemp. Clin. Trials* 2015;42:145-157.
11. Wilson DK, Sweeney AM, Law LH, et al. Web-Based Program Exposure and Retention in the Families Improving Together for Weight Loss Trial. *Annals of Behavioral Medicine* 2018;53(4):399-404.
12. Wilson DK, Sweeney AM, Quattlebaum M, et al. The Moderating Effects of the Families Improving Together (FIT) for Weight Loss Intervention and Parenting Factors on Family Mealtime in Overweight and Obese African American Adolescents. *Nutrients* 2021;13(6).
13. Quattlebaum M, Wilson DK, Sweeney AM, et al. Moderating Effects of Parental Feeding Practices and Emotional Eating on Dietary Intake among Overweight African American Adolescents. *Nutrients* 2021;13(6).
14. Wilson DK, Sweeney AM, Van Horn ML, et al. The Results of the Families Improving Together (FIT) for Weight Loss Randomized Trial in Overweight African American Adolescents. *Annals of behavioral medicine : a publication of the Society of Behavioral Medicine* 2022;56(10):1042-1055.
15. Biggs BK, Rodgers KV, Nayman SJ, et al. Translation of a family-based behavioral intervention for adolescent obesity using the RE-AIM framework and common steps from adaptation frameworks. *Translational behavioral medicine* 2023;13(9):700-709.
16. James KS, Connelly CD, Rutkowski E, et al. Family-based weight management with latino mothers and children. *J. Spec. Pediatr. Nurs.* 2008;13(4):249-262.
17. Estabrooks PA, Shoup JA, Gattshall M, et al. Automated telephone counseling for parents of overweight children: a randomized controlled trial. *Am. J. Prev. Med.* 2009;36(1):35-42. e32.
18. Zoellner JM, You W, Hill JL, et al. A comparative effectiveness trial of two family-based childhood obesity treatment programs in a medically underserved region: Rationale, design & methods. *Contemp. Clin. Trials* 2019;84:105801.
19. Zoellner JM, You W, Hill JL, et al. Comparing two different family-based childhood obesity treatment programmes in a medically underserved region: Effectiveness, engagement and implementation outcomes from a randomized controlled trial. *Pediatric obesity* 2022;17(1):e12840.
20. Nowicka P, Höglund P, Pietrobelli A, et al. Family Weight School treatment: 1-year results in obese adolescents. *Int. J. Pediatr. Obes.* 2008;3(3):141-147.
21. Joosse L, Stearns M, Anderson H, et al. Fit Kids/Fit Families: a report on a countywide effort to promote healthy behaviors. *Wis. Med. J.* 2008;107(5):231.
22. Soltero EG, Konopken YP, Olson ML, et al. Preventing diabetes in obese Latino youth with prediabetes: a study protocol for a randomized controlled trial. *BMC Public Health* 2017;17(1):1-12.
23. Peña A, Olson ML, Hooker E, et al. Effects of a Diabetes Prevention Program on Type 2 Diabetes Risk Factors and Quality of Life Among Latino Youths With Prediabetes: A Randomized Clinical Trial. *JAMA network open* 2022;5(9):e2231196.
24. Orban K, Edberg A-K, Thorngren-Jerneck K, et al. Changes in parents' time use and its relationship to child obesity. *Phys. Occup. Ther. Pediatr.* 2014;34(1):44-61.
25. Önerfält J, Erlandsson L-K, Orban K, et al. A family-based intervention targeting parents of preschool children with overweight and obesity: conceptual framework and study design of LOOPS-Lund overweight and obesity preschool study. *BMC Public Health* 2012;12(1):1-9.
26. Law C, Cole T, Cummins S, et al. A pragmatic evaluation of a family-based intervention for childhood overweight and obesity. *Public Health Res* 2014;2(5).
27. Sacher PM, Kolotourou M, Chadwick PM, et al. Randomized controlled trial of the MEND program: a family-based community intervention for childhood obesity. *Obesity* 2010;18(S1):S62-S68.
28. Wilson TA, Liu Y, Adolph AL, et al. Behavior modification of diet and parent feeding practices in a community-Vs primary care-centered intervention for childhood obesity. *J. Nutr. Educ. Behav.* 2019;51(2):150-161. e151.

29. Kitzman-Ulrich H, Wilson DK, St. George SM, et al. A preliminary test of a motivational and parenting weight loss program targeting low-income and minority adolescents. *Child Obes* 2011;7(5):379-384.
30. Chamay Weber C, Camparini N, Lanza L, et al. Parents' integration in the treatment of adolescents with obesity: A qualitative study. *Fam Syst Health* 2016;34(4):396.
31. Bocca G, Kuitert M, Sauer P, et al. A multidisciplinary intervention programme has positive effects on quality of life in overweight and obese preschool children. *Acta Paediatr.* 2014;103(9):962-967.
32. Bocca G, Kuitert MW, Sauer PJ, et al. Effect of a multidisciplinary treatment program on eating behavior in overweight and obese preschool children. *J. Pediatr. Endocrinol. Metab.* 2018;31(5):507-513.
33. Kitzman-Ulrich H, Hampson R, Wilson DK, et al. An adolescent weight-loss program integrating family variables reduces energy intake. *J Am Diet Assoc* 2009;109(3):491-496.
34. Ellis DA, Janisse H, Naar-King S, et al. The effects of multisystemic therapy on family support for weight loss among obese African-American adolescents: findings from a randomized controlled trial. *J. Dev. Behav. Pediatr.* 2010;31(6):461-468.
35. Idalski Carcone A, MacDonell KE, Naar-King S, et al. Treatment engagement in a weight loss intervention for African American adolescents and their families. *Child. Health Care* 2011;40(3):232-252.
36. Naar-King S, Ellis D, Kolmodin K, et al. A randomized pilot study of multisystemic therapy targeting obesity in African-American adolescents. *J. Adolesc. Health* 2009;45(4):417-419.
37. Flodmark C-E, Ohlsson T, Rydén O, et al. Prevention of progression to severe obesity in a group of obese schoolchildren treated with family therapy. *Pediatrics* 1993;91(5):880-884.
38. Ball GD, Mushquash AR, Keaschuk RA, et al. Using Intervention Mapping to develop the Parents as Agents of Change (PAC©) intervention for managing pediatric obesity. *BMC Res. Notes* 2017;10(1):1-11.
39. Ball GD, Ambler KA, Keaschuk RA, et al. Parents as Agents of Change (PAC) in pediatric weight management: The protocol for the PAC randomized clinical trial. *BMC Pediatr.* 2012;12(1):1-13.
40. Spence ND, Newton AS, Keaschuk RA, et al. Predictors of short-and long-term attrition from the parents as agents of change randomized controlled trial for managing pediatric obesity. *J. Pediatr. Health Care* 2017;31(3):293-301.
41. Spence ND, Newton AS, Keaschuk RA, et al. Parents as Agents of Change in Managing Pediatric Obesity: A Randomized Controlled Trial Comparing Cognitive Behavioral Therapy versus Psychoeducation Interventions. *Childhood obesity (Print)* 2023;19(2):71-87.
42. Steele RG, Aylward BS, Jensen CD, et al. Comparison of a family-based group intervention for youths with obesity to a brief individual family intervention: A practical clinical trial of positively fit. *J. Pediatr. Psychol.* 2011;37(1):53-63.
43. St. George SM, Wilson DK, Schneider EM, et al. Project SHINE: Effects of parent-adolescent communication on sedentary behavior in African American adolescents. *J. Pediatr. Psychol.* 2013;38(9):997-1009.
44. St. George SM, Wilson DK, Van Horn ML. Project SHINE: Effects of a randomized family-based health promotion program on the physical activity of African American parents. *J. Behav. Med.* 2018;41(4):537-549.
45. Nowicka P, Pietrobelli A, Flodmark C-E. Low-intensity family therapy intervention is useful in a clinical setting to treat obese and extremely obese children. *Int. J. Pediatr. Obes.* 2007;2(4):211-217.
46. Hadley W, McCullough MB, Rancourt D, et al. Shaking up the system: the role of change in maternal-adolescent communication quality and adolescent weight loss. *J. Pediatr. Psychol.* 2015;40(1):121-131.
47. Jelalian E, Hadley W, Sato A, et al. Adolescent weight control: An intervention targeting parent communication and modeling compared with minimal parental involvement. *J. Pediatr. Psychol.* 2015;40(2):203-213.
48. Herget S, Markert J, Petroff D, et al. Psychosocial well-being of adolescents before and after a 1-year telephone-based adiposity prevention study for families. *J. Adolesc. Health* 2015;57(3):351-354.
49. Markert J, Herget S, Petroff D, et al. Telephone-based adiposity prevention for families with overweight children (TAFF-Study): one year outcome of a randomized, controlled trial. *Int. J. Environ. Res. Public Health* 2014;11(10):10327-10344.

**Title:** Family systems approaches in pediatric obesity management: A scoping review **Authors:** N Wills-Ibarra, K Chemtob, H Hart, F Frati, KJ Pratt, GD Ball, A Van Hulst

50. Markert J, Alff F, Zschaler S, et al. Prevention of childhood obesity: Recruiting strategies via local paediatricians and study protocol for a telephone-based counselling programme. *Obes. Res. Clin. Pract.* 2013;7(6):e476-e486.
